# Supplementary material for: A Prussian blue analog as a decorporation agent for the simultaneous removal of cesium and reactive oxygen species
Source: Royal Society of Chemistry journal article supplement (doi:10.1039/d3na00388d), 2023-01-01
Supplement: d3na00388d1.pdf [file d3na00388d1.pdf]

## Supporting Information

### Prussian blue analog as a decorporation agent for the efficient removal of cesium and scavenging of reactive oxygen species

Tingyu Xue <sup>†a</sup>, Fang Liu <sup>†b</sup>, Bin Lu<sup>a</sup>, Qingrong Dong <sup>a</sup>, Bin Zhao <sup>a</sup>, Tianqing Chen <sup>b</sup>, Kun Zhang <sup>b</sup>, Jianguo Li<sup>\*c</sup>, Jiangfeng Du<sup>\* a, b, d</sup>.

*a Department of Medical Imaging, Shanxi Key Laboratory of Intelligent Imaging and Nanomedicine, First Hospital of Shanxi Medical University, Taiyuan, 030001, Shanxi Province, China.*

*b College of Pharmacy, Shanxi Medical University, Jinzhong, 030619, Shanxi Province, China.*

*c National Atomic Energy Agency Nuclear Technology (Nonclinical evaluation of radiopharmaceuticals) Research and Development Center, CNNC Key Laboratory on Radiotoxicology and Radiopharmaceutical Preclinical Evaluation, China Institute for Radiation Protection, Taiyuan 030001, China.*

*d Collaborative Innovation Center for Molecular Imaging of Precision Medicine, Shanxi Medical University, Taiyuan 030001, Shanxi Province, China.*

## Content

|                                                                             |          |
|-----------------------------------------------------------------------------|----------|
| <b>Figure S1.</b> TEM image of PBAs .....                                   | <b>3</b> |
| <b>Figure S2.</b> SEM image of PBAs .....                                   | <b>3</b> |
| <b>Figure S3.</b> Size distribution of PBAs .....                           | <b>3</b> |
| <b>Figure S4.</b> XRD spectra of PBAs .....                                 | <b>4</b> |
| <b>Figure S5.</b> IR spectra of PBAs .....                                  | <b>4</b> |
| <b>Figure S6.</b> C 1s XPS spectra of FeFe and CuFe .....                   | <b>4</b> |
| <b>Figure S7.</b> Cesium adsorption test of PBAs .....                      | <b>5</b> |
| <b>Figure S8.</b> Cytotoxicity of CuFe .....                                | <b>5</b> |
| <b>Figure S9.</b> Detection of ROS-scavenging ability of CuFe .....         | <b>6</b> |
| <b>Figure S10.</b> Stability test of Alg-FeFe and Alg-CuFe .....            | <b>6</b> |
| <b>Figure S11.</b> Copper ion release experiment .....                      | <b>7</b> |
| <b>Table S1.</b> Synthesis conditions of PB and PBAs. ....                  | <b>8</b> |
| <b>Table S2.</b> Quantitative analysis of element according to ICP-OES..... | <b>8</b> |
| <b>Table S3.</b> Element peak area according to the XPS spectra .....       | <b>8</b> |

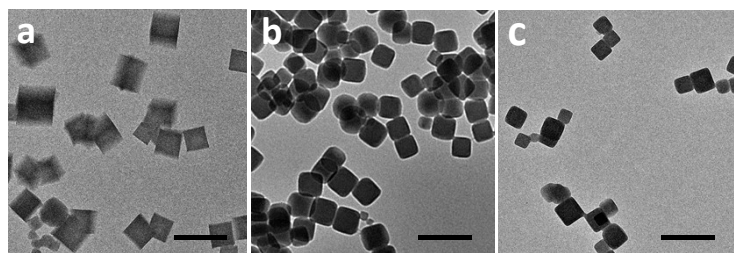

**Figure S1.** TEM image of MnFe(a), NiFe(b), CoFe(c). Scale bars: 200 nm

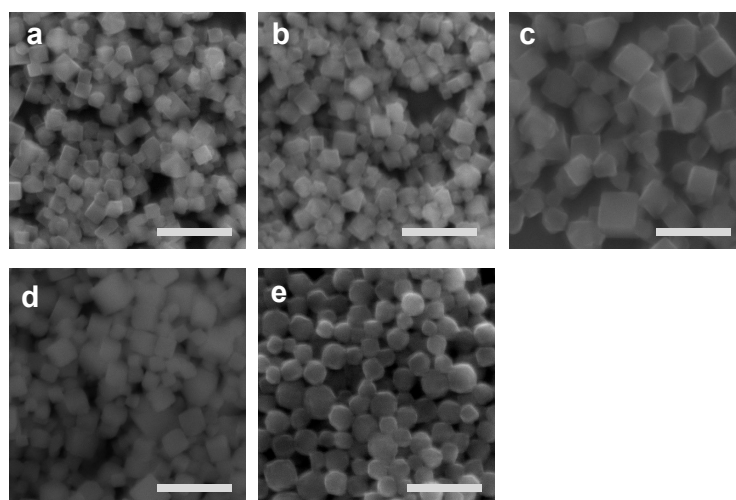

**Figure S2.** SEM image of FeFe (a), CuFe (b), MnFe (c), NiFe (d), CoFe (e). Scale bars: 200 nm

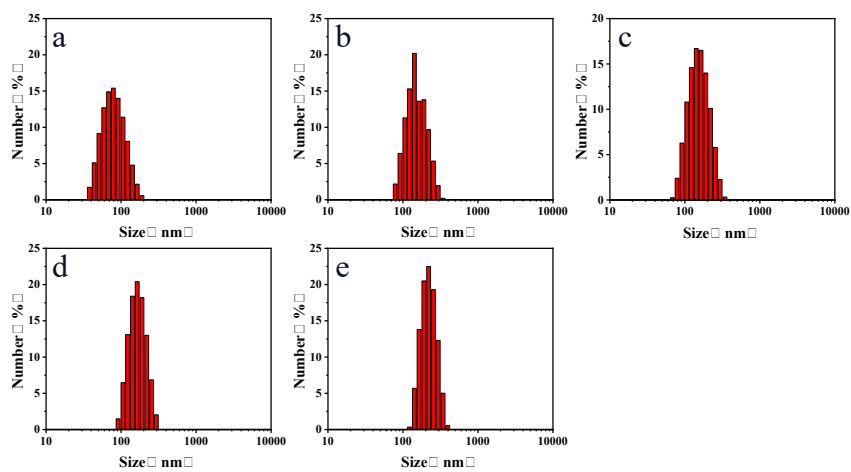

**Figure S3.** Size distribution of FeFe (a), CuFe (b), MnFe (c), NiFe (d), CoFe (e).

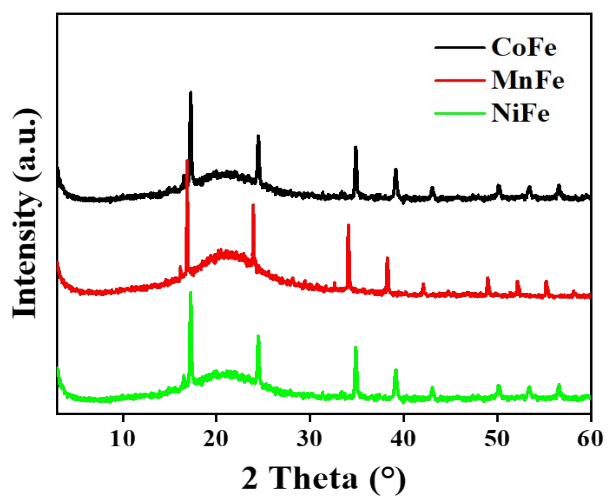

Figure S4. XRD spectra of MnFe , NiFe , CoFe.

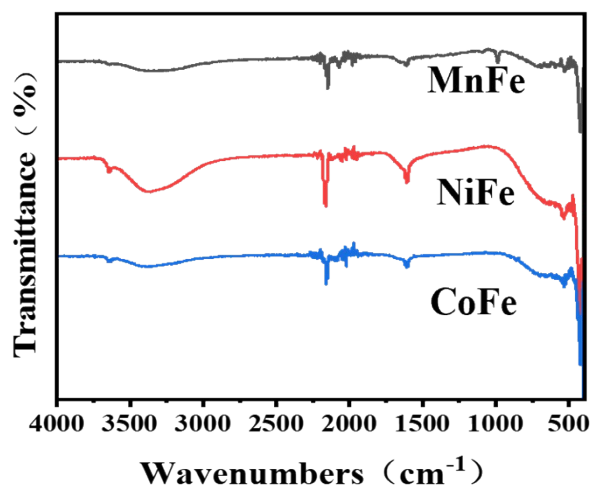

Figure S5. IR spectra of MnFe , NiFe , CoFe.

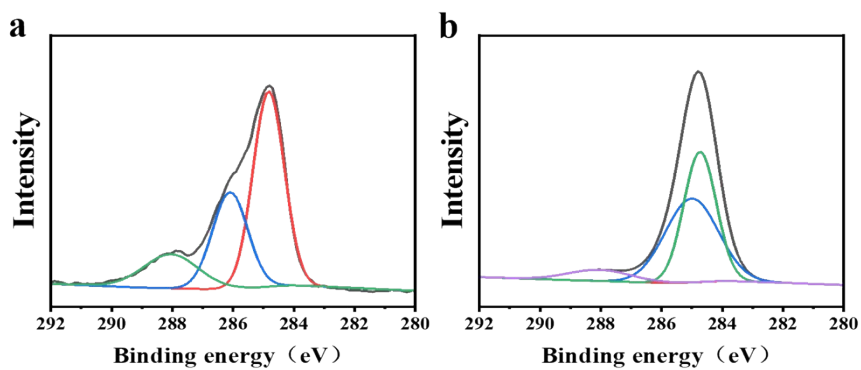

Figure S6. a, C 1s XPS spectra of FeFe. b, C 1s XPS spectra of CuFe.

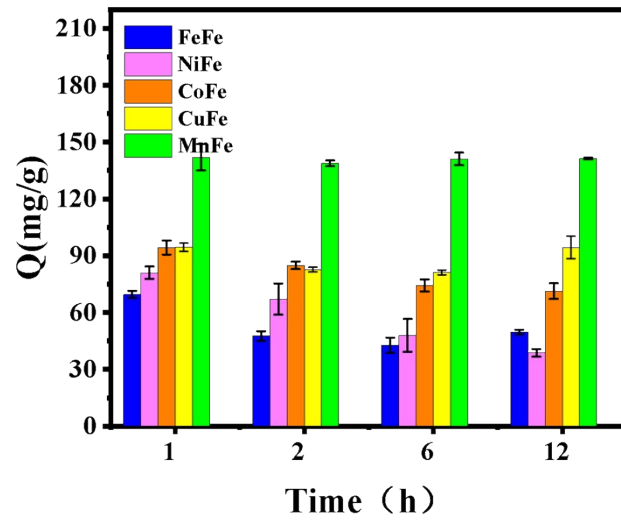

**Figure S7.** Cesium adsorption test of FeFe, CuFe, NiFe, CoFe, MnFe ( $\text{Cs}^+$  solution: 100ppm, pH = 7.4, T= 310.15 K, m/V=500  $\mu\text{g}/\text{ml}$ ).

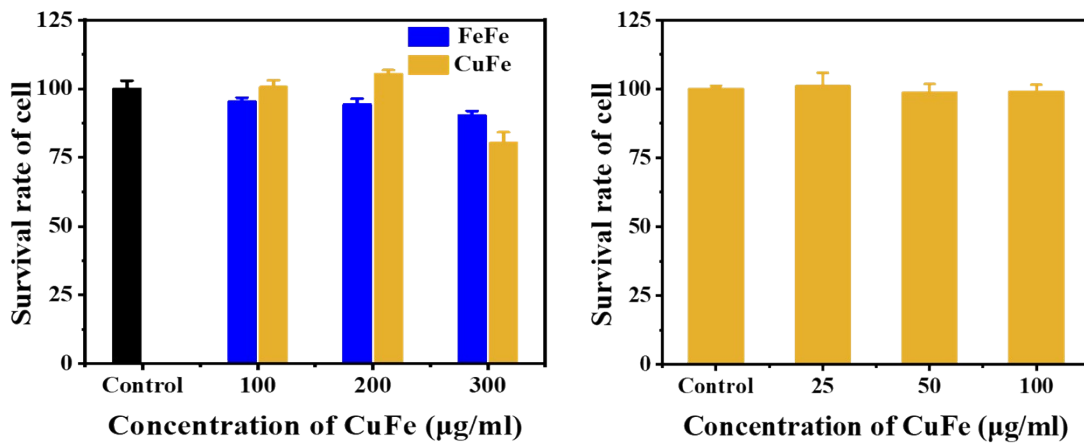

**Figure S8.** Cytotoxicity (HUVEC (a), L02 (b)) of CuFe.

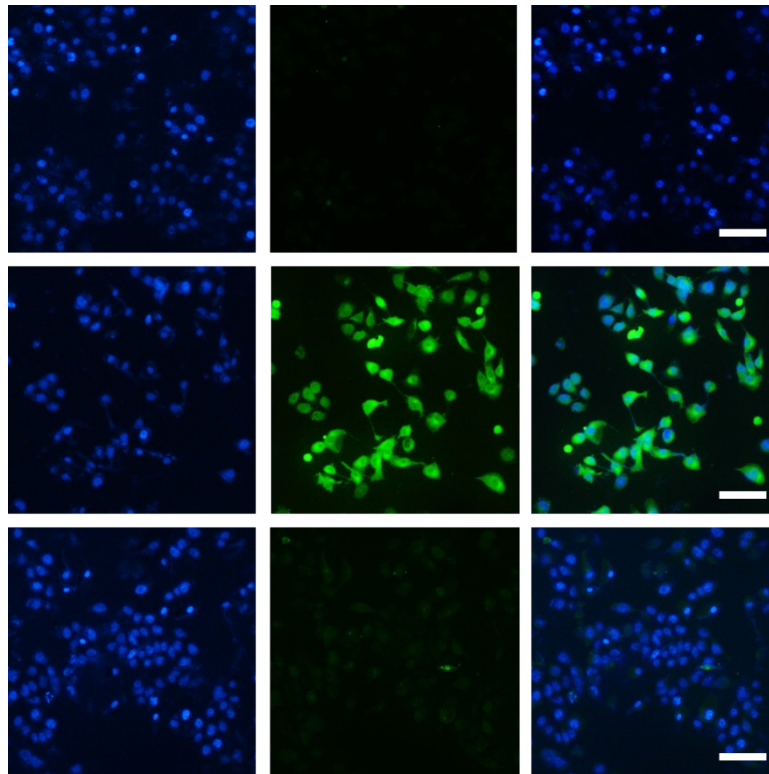

**Figure S9.** Detection of ROS-scavenging ability of 50 µg/mL CuFe in L02 cells under stimulations with H<sub>2</sub>O<sub>2</sub> by fluorescence microscopy. Scale bars, 500 µm.

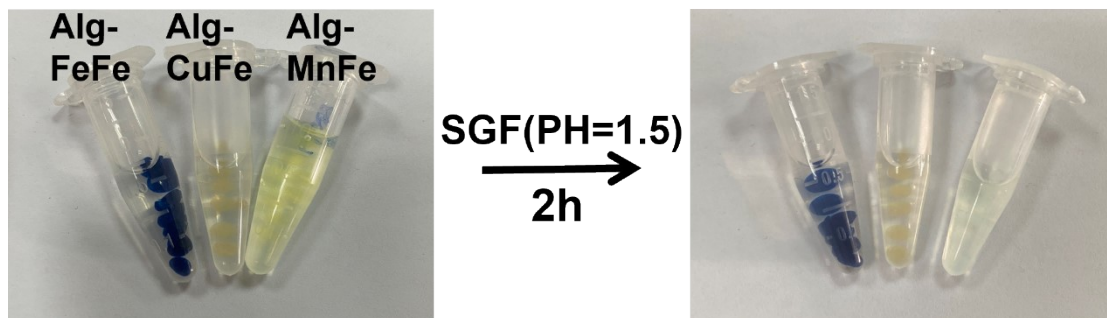

**Figure S10.** Stability test of FeFe and CuFe coated with sodium alginate in simulated gastric juices (SGF). FeFe and CuFe in Alg-FeFe and Alg-CuFe can be stably present in SGF. On the contrary, MnFe in Alg-MnFe disappeared into the SGF.

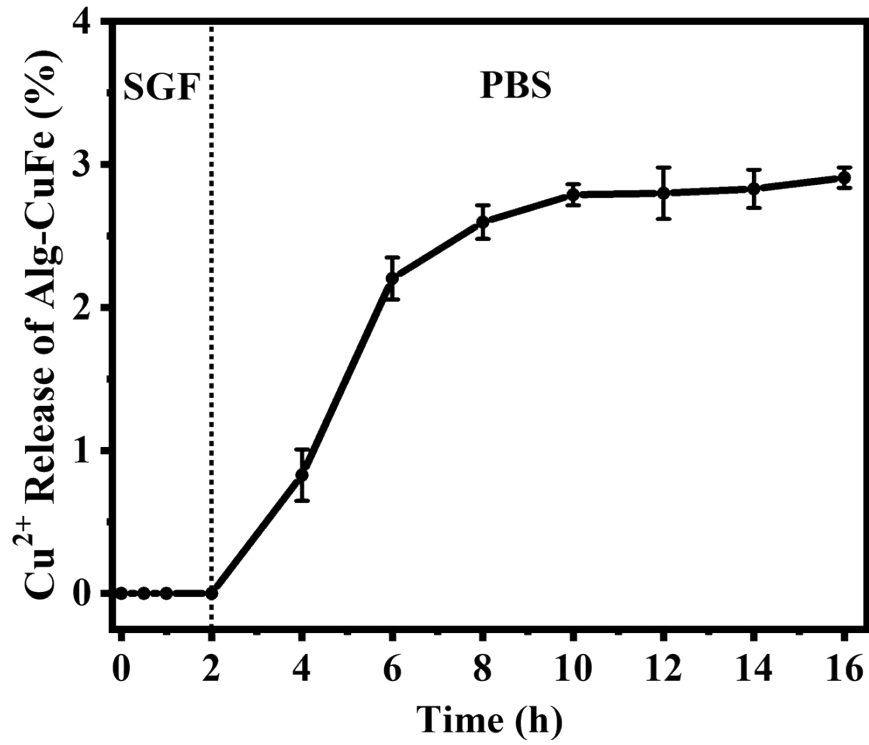

Figure S11. Copper ion release experiment of Alg-CuFe in simulated SFG and PBS.

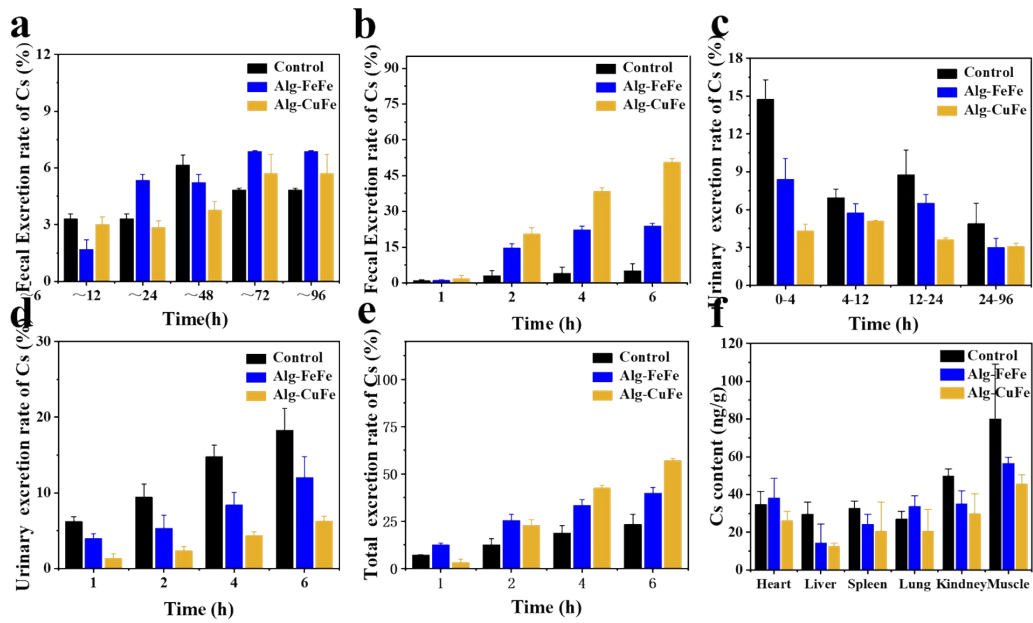

Figure S12. a, Excretion rate of Cs ions in faeces (a,b) and urine (c,d) compared to the initial Cs dose; e, Total excretion rate of Cs ions compared to the initial Cs dose; Residual quantity of Cs ions in the heart, liver, spleen, lung, kidney, and muscle

**Table S1.** Synthesis conditions of PB and PBAs.

|      | Precursor 1                                             | Concentration<br>(mM) | Precursor 2                              | Concentration<br>(mM) | citric<br>acid<br>(mM) | churning<br>time (m<br>in) | churning<br>time (°C) |
|------|---------------------------------------------------------|-----------------------|------------------------------------------|-----------------------|------------------------|----------------------------|-----------------------|
| FeFe | Fe(NO <sub>3</sub> ) <sub>3</sub> ·9H <sub>2</sub> O    | 2.5                   | K <sub>4</sub> [Fe(CN) <sub>6</sub> ]    | 0.5                   | 250                    | 15                         | 60                    |
| CuFe | Cu(CH <sub>3</sub> COO) <sub>2</sub> ·H <sub>2</sub> O  | 3                     | K <sub>3</sub><br>[Fe(CN) <sub>6</sub> ] | 2                     | 250                    | 15                         | 60                    |
| NiFe | Ni(CH <sub>3</sub> COO) <sub>2</sub> ·4H <sub>2</sub> O | 7.5                   | K <sub>3</sub><br>[Fe(CN) <sub>6</sub> ] | 5                     | 250                    | 15                         | 60                    |
| CoFe | Co(NO <sub>3</sub> ) <sub>2</sub> ·6H <sub>2</sub> O    | 10                    | K <sub>3</sub><br>[Fe(CN) <sub>6</sub> ] | 7.5                   | 0                      | 60                         | 25                    |
| MnFe | Mn(SO <sub>4</sub> ) <sub>2</sub> ·H <sub>2</sub> O     | 10                    | K <sub>3</sub><br>[Fe(CN) <sub>6</sub> ] | 10                    | 0                      | 15                         | 25                    |

**Table S2.** Quantitative analysis of element according to ICP-OES.

|      | Fe     | Cu     | Mn     | Ni     | Co     |
|------|--------|--------|--------|--------|--------|
| FeFe | 33.19% |        |        |        |        |
| FeCu | 9.30%  | 18.20% |        |        |        |
| MnFe | 9.63%  |        | 14.65% |        |        |
| NiFe | 10.21% |        |        | 16.28% |        |
| CoFe | 9.78%  |        |        |        | 18.76% |

**Table S3.** Element peak area according to the XPS spectra.

|      | Fe (II)   | Fe (III)  | Cu | N         | C         |
|------|-----------|-----------|----|-----------|-----------|
| FeFe | 16212.286 | 11856.395 |    | 16929.508 | 17469.759 |



---

|      |           |           |          |           |
|------|-----------|-----------|----------|-----------|
| CuFe | 34276.594 | 53172.326 | 17597.63 | 18472.662 |
|------|-----------|-----------|----------|-----------|

---

**Table S4.** The surface atomic ratio for FeFe and CuFe according to the XPS spectra.

---

|      | Fe(II)/Fe(III) | Fe(III)/Cu | Cu/N | Fe(II)/N | C/N |
|------|----------------|------------|------|----------|-----|
| FeFe | 0.74           |            |      | 0.7      | 1   |
| CuFe |                | 0.6        | 3.02 |          | 1   |

---
